# Supplementary material
Source: publisher figshare collection journal article supplement (https://frontiersin.figshare.com/ndownloader/files/31321039)
Supplement: Supplementary file 1 [file 31321039]

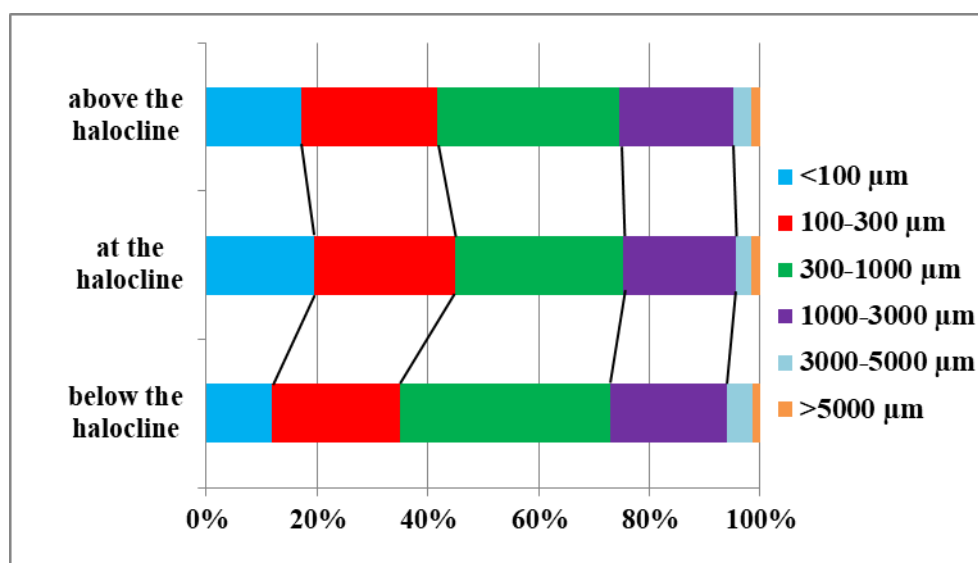

**Figure S5** Size distribution of microplastics above the halocline, at the halocline and in water layers below the halocline.
